# Supplementary material
Source: PubMed Central journal article supplement (PMC2887568)
Supplement: supp_90_9_2251__1.pdf [file supp_90_9_2251__1.pdf]

**Supplementary Table S1.** Primers used for the generation of EBNA1P10A

Primers for each phosphosite are shown. The amino acid mutation designed to change the serine or threonine to alanine is shown in bold and underlined.

| EBNA1 phosphosite | 5' primer                                                                        | 3' primer                                                                         |
|-------------------|----------------------------------------------------------------------------------|-----------------------------------------------------------------------------------|
| Thr8              | 5'-GAGGGGCCAGGT <u><b>GC</b></u> AGGACCTGGAAATGCG                                | 5'-GCCATTTCAGGTCT <u><b>TG</b></u> CACCTGGCCCCTC                                  |
| Thr20             | 5'-GAGAAGGGAGAC <u><b>GC</b></u> AGCTGGACCAGAAGGC                                | 5'-GCCTTCTGGTCCAGCT <u><b>TG</b></u> CGTCTCCCTTCTC                                |
| Ser21             | 5'-AAGGGAGACAC <u><b>AGCT</b></u> GGACCAGAAGGC                                   | 5'-GCCTTCTGGTCC <u><b>AGCT</b></u> TGTGTCTCCCTT                                   |
| Ser60 and Ser62   | 5'-CCGGGCGGC <u><b>GC</b></u> AGGAG <u><b>GC</b></u> AGGGCCAAGA                  | 5'-TCTTGGCCCT <u><b>TG</b></u> CTCC <u><b>TG</b></u> CGCCGCCCGG                   |
| Ser78             | 5'-CCCCAAAAACGTCCA <u><b>GCT</b></u> TGCATTGGCTGC                                | 5'-GCAGCCAATGCA <u><b>AGCT</b></u> TGGACGTTTTTGGGG                                |
| Ser334            | 5'-TCGAGGAGGC <u><b>GCT</b></u> GGAGGCCGGGGTCGA                                  | 5'-TCGACCCCGGCCTCC <u><b>AGC</b></u> GCCTCCTCGA                                   |
| Ser365            | 5'-GCCAGGGGGG <u><b>AGCT</b></u> CGTGAAGAGCC                                     | 5'-GGCTCTTTCACG <u><b>AGCT</b></u> TCCCCCCTGGC                                    |
| Ser383            | 5'-CCCAGG <u><b>GCT</b></u> CCCAGTAGTCAGTCATCATCCTCCGGG <u><b>GCT</b></u> CCACCG | 5'-CGGTGG <u><b>AGC</b></u> CCCCGGATGATGATGACTGACTACTGGG <u><b>AGC</b></u> CCTGGG |
| Ser3903           | 5'-CATCATCCGGG <u><b>GCT</b></u> TCCACCGCGCAGGCC                                 | 5'-GGCCTGCGGGTGG <u><b>AGC</b></u> CCCCGGATGATG                                   |
